# Supplementary material
Source: publisher site journal article supplement (https://www.dovepress.com/article/603491)
Supplement: Supplementary file 1 [file 603491%20Revised%20eTables%201-2.docx]

**eTable1. The reported chemical constituents of Yupingfeng San**

| No | Compounds | Formula | Refs. | Class |
| --- | --- | --- | --- | --- |
| 1 | Baicalein | C₁₅H₁₀O₅ | Huang21 | Flavonoid |
| 2 | Wogonin | C₁₆H₁₂O₅ | Li22 | Flavonoid |
| 3 | Baicalin | C₂₁H₁₈O₁₁ | Li23 | Flavonoid |
| 4 | Quercetin dihydrate | C₁₅H₁₄O₉ | Jia24 | Flavonoid |
| 5 | Isorhamnetin | C₁₆H₁₂O₇ | Jia24 | Flavonoid |
| 6 | Rhamnocitrin | C₁₆H₁₂O₆ | Jia24 | Flavonoid |
| 7 | Apigenin | C₁₅H₁₀O₅ | Jia24 | Flavonoid |
| 8 | Thamnosmonin | C₁₅H₁₆O₅ | Li25 | Flavonoid |
| 9 | Quercetin | C₁₅H₁₀O₇ | Yue26 | Flavonoid |
| 10 | Kaempferol | C₁₅H₁₀O₆ | Li22 | Flavonoid |
| 11 | Daidzein | C₁₅H₁₀O₄ | Huang21 | Flavonoid |
| 12 | Genistein | C₁₅H₁₀O₅ | Li23 | Flavonoid |
| 13 | 3-Hydroxy-9,10-dimethoxypterocarpan | C₁₇H₁₆O₅ | Nikles13 | Flavonoid |
| 14 | (6aR,11aR)-9,10-Dimethoxypterocarpan-3-O-β-D-glucoside | C₂₃H₂₆O₁₀ | Nikles13 | Flavonoid |
| 15 | Calycosin | C₁₆H₁₂O₅ | Yao27 | Flavonoid |
| 16 | Calycosin-7-glucoside | C₂₂H₂₂O₁₀ | Shen28 | Flavonoid |
| 17 | Formononetin | C₁₆H₁₂O₄ | Yao27 | Flavonoid |
| 18 | Ononin | C₂₂H₂₂O₉ | Yao27 | Flavonoid |
| 19 | Decursin | C₁₉H₂₀O₅ | Huang21 | Coumarin |
| 20 | Decursinol angelate | C₁₉H₂₀O₅ | Huang21 | Coumarin |
| 21 | Marmesinin | C₁₄H₁₄O₄ | Li22 | Coumarin |
| 22 | Nodakenitin | C₁₄H₁₄O₄ | Li23 | Coumarin |
| 23 | Isofraxidin | C₁₁H₁₀O₅ | Jia24 | Coumarin |
| 24 | Imperatorin | C₁₆H₁₄O₄ | Jia24 | Coumarin |
| 25 | Isoscopoletin | C₁₀H₈O₄ | Li25 | Coumarin |
| 26 | Seselidiol | C₁₇H₂₄O₂ | Li25 | Coumarin |
| 27 | Phellopterin | C₁₇H₁₆O₅ | Li25 | Coumarin |
| 28 | Isopsoralen | C₁₁H₆O₃ | Du29 | Coumarin |
| 29 | Scopoletin | C₁₀H₈O₄ | Du29 | Coumarin |
| 30 | 8-Methoxypsoralen | C₁₂H₈O₄ | Nikles13 | Coumarin |
| 31 | Bergapten | C₁₂H₈O₄ | Nikles13 | Coumarin |
| 32 | Deltoin | C₁₉H₂₀O₅ | Nikles13 | Coumarin |
| 33 | Ledebouriellol | C₂₀H₂₂O₇ | Nikles13 | Coumarin |
| 34 | Psoralen | C₁₁H₆O₃ | Yuan30 | Coumarin |
| 35 | Sec-o-glucosylhamaudol | C₂₂H₂₆O₁₀ | Yao27 | Coumarin |
| 36 | Graveolone | C₁₄H₁₂O₄ | Li25 | Coumarin |
| 37 | β-Sitosterol | C₂₉H₅₀O | Li22 | Triterpene |
| 38 | Astragaloside VII | C₄₇H₇₈O₁₉ | Huang21 | Triterpene |
| 39 | Isoastragaloside I | C₄₅H₇₂O₁₆ | Huang21 | Triterpene |
| 40 | Isoastragaloside II | C₄₃H₇₀O₁₅ | Huang21 | Triterpene |
| 41 | Isoastragaloside IV | C₄₆H₇₆O₁₇ | Huang21 | Triterpene |
| 42 | Soyasaponin | C₄₈H₇₈O₁₈ | Li22 | Triterpene |
| 43 | Acetylastragaloside I | C₄₇H₇₄O₁₇ | Li23 | Triterpene |
| 44 | Soyasaponin Bd | C₄₈H₇₆O₁₉ | Li23 | Triterpene |
| 45 | Cycloastragenol | C₃₀H₅₀O₅ | Li31 | Triterpene |
| 46 | Astragaloside I | C₄₅H₇₂O₁₆ | Nikles13 | Triterpene |
| 47 | Astragaloside II | C₄₃H₇₀O₁₅ | Nikles13 | Triterpene |
| 48 | Astragaloside III | C₄₁H₆₈O₁₄ | Du29 | Triterpene |
| 49 | Astragaloside IV | C₄₁H₆₈O₁₄ | Du29 | Triterpene |
| 50 | β-Amyrin | C₃₀H₅₀O | Li22 | Triterpene |
| 51 | Lupeol | C₃₀H₅₀O | Jia24 | Triterpene |
| 52 | Erythrodiol 3-acetate | C₃₂H₅₂O₂ | Jia24 | Triterpene |
| 53 | Norcimifugin | C₁₅H₁₆O₆ | Huang21 | Chromone |
| 54 | Hamaudol | C₁₅H₁₆O₅ | Li23 | Chromone |
| 55 | 3-O-Acetylhamaudol | C₁₇H₁₈O₆ | Jia24 | Chromone |
| 56 | 3′-O-Angeloylhamaudol | C₂₀H₂₂O₆ | Huang21 | Chromone |
| 57 | Divaricataester B | C18H20O7 | Li25 | Chromone |
| 58 | Cimicifugaside | C₂₂H₂₈O₁₀ | Yue26 | Chromone |
| 59 | 4-O-β-glucopyranosyl-5-O-methylvisamminol | C₂₃H₃₀O₁₀ | Li31 | Chromone |
| 60 | 4-O-β-D-Glucosyl-5-O-methylvisamminol | C₂₂H₂₈O₁₀ | Yuan30 | Chromone |
| 61 | 5-O-Methylvisamminol | C₁₆H₁₈O₅ | Nikles13 | Chromone |
| 62 | Cimifugin | C₁₆H₁₈O₅ | Yao27 | Chromone |
| 63 | prim-O-Glucosylcimifugin | C₂₂H₂₈O₁₁ | Yao27 | Chromone |
| 64 | 4′-O-Glucopyranosyl-5-O-methylvisamminol | C₂₃H₃₀O₁₁ | Yao27 | Chromone |
| 65 | 4-Isopropylbenzaldehyde | C₁₀H₁₂O | Li25 | Phenylpropanoid |
| 66 | Benzaldehyde | C₇H₆O | Li25 | Phenylpropanoid |
| 67 | Naphthalene | C₁₀H₈ | Li25 | Phenylpropanoid |
| 68 | Atractylodin | C₁₃H₁₀O | Jia24 | Phenylpropanoid |
| 69 | Acetophenone | C₈H₈O | Li25 | Phenylpropanoid |
| 70 | Neochlorogenic acid | C₁₆H₁₈O₉ | Li23 | Phenylpropanoid |
| 71 | Divaricatol | C₁₇H₁₈O₇ | Li23 | Phenylpropanoid |
| 72 | cis-p-Coumaric acid | C₉H₈O₃ | Li25 | Phenylpropanoid |
| 73 | alpha-Asarone | C₁₂H₁₆O₃ | Li25 | Phenylpropanoid |
| 74 | 3,5-Dimethoxystilbene | C₁₆H₁₆O₂ | Li25 | Phenylpropanoid |
| 75 | Neocnidilide | C₁₂H₁₈O₂ | Li25 | Phenylpropanoid |
| 76 | (+)-beta-Sesquiphellandrene | C₁₅H₂₄ | Li25 | Sesquiterpene |
| 77 | beta-Selinene | C₁₅H₂₄ | Li25 | Sesquiterpene |
| 78 | Cuparene | C₁₅H₂₂ | Li25 | Sesquiterpene |
| 79 | (-)-alpha-Curcumene | C₁₅H₂₂ | Li25 | Sesquiterpene |
| 80 | Atractylon | C₁₅H₂₀O | Yuan30 | Sesquiterpene |
| 81 | Atractylenolide I | C₁₅H₁₈O₂ | Nikles13 | Sesquiterpene |
| 82 | Atractylenolide II | C₁₅H₂₀O₂ | Nikles13 | Sesquiterpene |
| 83 | Atractylenolide III | C₁₅H₂₀O₃ | Nikles13 | Sesquiterpene |
| 84 | Selina-4(14),7(11)-dien-8-one | C₁₅H₂₂O | Li25 | Sesquiterpene |
| 85 | alpha-Cuparenol | C₁₅H₂₂O | Li25 | Sesquiterpene |
| 86 | Vanillic acid | C₈H₈O₄ | Li23 | Phenolic acid |
| 87 | Cryptochlorogenic acid | C₁₆H₁₈O₉ | Li23 | Phenolic acid |
| 88 | Chlorogenic acid | C₁₆H₁₈O₉ | Li23 | Phenolic acid |
| 89 | Cynarin | C₂₅H₂₄O₁₂ | Li23 | Phenolic acid |
| 90 | Isochlorogenic acid A | C₂₅H₂₄O₁₂ | Li23 | Phenolic acid |
| 91 | Isochlorogenic acid B | C₂₅H₂₄O₁₂ | Li23 | Phenolic acid |
| 92 | Isochlorogenic acid C | C₂₅H₂₄O₁₂ | Li23 | Phenolic acid |
| 93 | Palmitic acid | C₁₆H₃₂O₂ | Li25 | Fatty acid |
| 94 | Pentadecanoic acid | C₁₅H₃₀O₂ | Li25 | Fatty acid |
| 95 | Myristic acid | C₁₄H₂₈O₂ | Li25 | Fatty acid |
| 96 | Linoleic acid | C₁₈H₃₂O₂ | Hong32 | fatty acid |
| 97 | 13-Hydroxy-9,11-octadecadienoic acid | C₁₈H₃₂O₃ | Li25 | Fatty acid |
| 98 | Sucrose | C₁₂H₂₂O₁₁ | Li23 | Alkaloid |
| 99 | Dauricine | C₃₈H₄₄N₂O₆ | Li25 | Alkaloid |
| 100 | Capsaicin | C₁₈H₂₇NO₃ | Li25 | Alkaloid |
| 101 | Betaine | C₅H₁₁NO₂ | Li25 | Alkaloid |
| 102 | Benzylisovalerate | C₁₂H₁₆O₂ | Li25 | Carboxylic Acid Derivatives |
| 103 | Diisobutyl phthalate | C₁₆H₂₂O₄ | Li25 | Carboxylic Acid Derivatives |
| 104 | Dibutylphthalate | C₁₆H₂₂O₄ | Li25 | Carboxylic Acid Derivatives |
| 105 | beta-Pinene | C₁₀H₁₆ | Li25 | Monoterpene |
| 106 | Terpinolene | C₁₀H₁₆ | Li25 | Monoterpene |
| 107 | (+)-alpha-Thujene | C₁₀H₁₆ | Li25 | Monoterpene |
| 108 | Panaxynol | C₁₇H₂₄O | Hong32 | Acetylene |
| 109 | D-Mannitol | C₆H₁₄O₆ | Jia24 | Alcohol |
| 110 | Proline | C₅H₉NO₂ | Li25 | Amino acid |
| 111 | Quinic acid | C₇H₁₂O₆ | Li23 | Organic acid |
| 112 | Adenine | C₅H₅N₅ | Li23 | Saccharide |

**eTable 2. Summary of clinical evidence for Yupingfeng San (YPFS) across different diseases**

|  | **Study (First author, year)** | **Study design** | **Sample size (n)** | **Intervention** | **Control group** | **Treatment duration** | **Primary outcomes** | **Main findings** |
| --- | --- | --- | --- | --- | --- | --- | --- | --- |
| 6.1 Allergic Rhinitis | | | | | | | | |
|  | Lin (2025)110 | multicenter RCT | 58 | YPFS | placebo | 8 w | RQLQ, adverse reactions | Improved RQLQ scores vs placebo; well tolerated, no serious adverse events |
|  | Guo (2016)111 | RCT | 120 | YPFS+Conventional treatment | Conventional treatment | 7 w | TCM symptom score, clinical effective rate, 1-year recurrence rate, adverse reactions | Higher response rate, reduced symptoms and recurrence; no adverse events |
|  | Yan (2011)112 | RCT | 204 | YPFS | Conventional treatment | 4 w | Clinical efficacy**#** | Higher overall response rate vs conventional treatment |
| 6.2 Asthma | | | | | | | | |
|  | Wang (2007)113 | RCT | 120 | YPFS+Conventional treatment | Conventional treatment | 4 w | Clinical efficacy# | Higher response rate vs conventional treatment |
|  | Han (2009)114 | RCT | 78 | YPFS+Conventional treatment | Conventional treatment | 8 w | Clinical efficacy#, IgE, IgG | Improved efficacy with reduced IgE/IgG |
|  | Jiang (2010)115 | RCT | 60 | YPFS | Conventional treatment | 12 w | Clinical efficacy#, recurrence rate, Eosinophil count | Higher response rate, lower recurrence, reduced eosinophils |
|  | Zhang (2017)116 | RCT | 114 | YPFS+Conventional treatment | Conventional treatment | 12 w | Clinical efficacy#, Th17/Treg, Pulmonary function indices | Improved efficacy, reduced Th17/Treg, enhanced immune balance and lung function |
|  | Song (2016)117 | RCT | 84 | YPFS+Conventional treatment | Conventional treatment | 8 w | Clinical efficacy#, Asthma Control Test, Pulmonary function indices | Higher response rate, symptom relief, improved lung function |
|  | Xing (2015)118 | RCT | 92 | YPFS+Conventional treatment | Conventional treatment | 8 w | Clinical efficacy# | Higher response rate; reduced 1-year recurrence of cough and asthma |
|  | Li (2020)119 | RCT | 80 | YPFS+Conventional treatment | Conventional treatment | 12 w | Clinical efficacy#, Serum immune cell levels, Disease severity | Improved efficacy, enhanced immune cell profiles, reduced severity |
|  | Chan (2016)120 | RCT | 57 | YPFS+Conventional treatment | Conventional treatment | 24 w | Pulmonary function indices，Asthma Control Test, IgE | Improved ACT scores, reduced IgE; no serious adverse events |
| 6.3 Skin diseases | | | | | | | | |
|  | Han (2015)123 | RCT | 120 | YPFS+Conventional treatment | Conventional treatment | 4 w | Clinical efficacy#, Recurrence rate | Higher response rate; reduced recurrence and adverse events |
|  | Xu (2020)124 | RCT | 50 | YPFS | Other Chinese medicines | 2 w | Clinical symptom score, Lesion area score | Reduced symptom and lesion scores; good safety |
|  | Fang (2018)125 | RCT | 98 | YPFS+Conventional treatment | Other Chinese medicines+Conventional treatment | 4 w | Clinical efficacy#, Eczema Area and Severity Index score, Clinical symptom score | Reduced EASI and symptom scores; improved efficacy |
|  | Zhao (2017)126 | RCT | 120 | YPFS+Other Chinese medicines | Other Chinese medicines | 4 w | Clinical efficacy#, Eczema Area and Severity Index score, Recurrence rate | Reduced EASI and recurrence; higher response rate |
|  | Hu (2018)127 | Cohort | 118 | YPFS+Other Chinese medicines | Other Chinese medicines | 4 w | Clinical efficacy#, Eczema Area and Severity Index score, Itch score | Reduced EASI and pruritus; higher response rate |
|  | Dong (2019)128 | RCT | 32 | YPFS+Other Chinese medicines | Other Chinese medicines | 4 w | Eczema Area and Severity Index score, Recurrence rate | Reduced EASI and symptoms; lower recurrence |
|  | Liu (2020)129 | RCT | 98 | YPFS+Conventional treatment | Conventional treatment | 4 w | Eczema Area and Severity Index score, IgE | Higher response rate; reduced EASI and IgE; good safety |
|  | Xu (2022)130 | RCT | 50 | YPFS+Conventional treatment | Conventional treatment | 4 w | Eczema Area and Severity Index score, Clinical efficacy# | Higher response rate; reduced EASI and symptoms; improved immune/inflammatory status |
|  | Chen (2018)13  1 | RCT | 80 | YPFS | Conventional treatment | 4 w | Clinical efficacy#, TNF-α, IL-8 | Higher response rate; reduced TNF-α and IL-8 |
|  | Yao (2017)132 | RCT | 130 | YPFS | Conventional treatment | 4 w | Clinical efficacy#, Recurrence rate, Th1/Th2 | Higher response rate; reduced recurrence; improved Th1/Th2 balance |
|  | Wen (2022)133 | RCT | 82 | YPFS+Conventional treatment | Conventional treatment | 4 w | Clinical efficacy#, Inflammatory factors levels | Higher response rate; reduced inflammatory factors |
|  | Fan (2015)134 | RCT | 98 | YPFS+Conventional treatment | Conventional treatment | 4 w | Clinical efficacy#, Recurrence rate | Higher response rate; reduced recurrence |
|  | Li (2021)135 | RCT | 60 | YPFS+Conventional treatment | Conventional treatment | 4 w | Clinical efficacy#, Recurrence rate | Higher response rate; reduced recurrence |
|  | Wang (2004)136 | Cohort | 100 | YPFS | Other Chinese medicines | 2 w | Clinical efficacy# | Superior efficacy vs other Chinese medicines |
|  | Chu (2017)137 | RCT | 120 | YPFS+Conventional treatment | Conventional treatment | 5 w | Clinical efficacy#, IgE | Higher response rate; reduced IgE |
|  | Liu (2024)138 | RCT | 116 | YPFS+Conventional treatment | Conventional treatment | 12 w | Clinical efficacy#, Urticaria Activity Score over 7 days， Th17/Treg | Improved efficacy; reduced urticaria symptoms; improved immune balance |
| 6.4 Antitumor Effects | | | | | | | | |
| 6.4. 1. Lung Cancer | | | | | | | | |
|  | Xie (2017)141 | RCT | 100 | YPFS+Conventional treatment | Conventional treatment | 6 w | Immune indexes, Karnofsky Performance Status score | Improved immune function and quality of life |
|  | Chen (2013)142 | RCT | 60 | YPFS+Other Chinese medicines+Conventional treatment | Conventional treatment | 6 w | Immune indexes, T lymphocyte subsets | Improved post-chemotherapy immune indices vs conventional treatment |
|  | Wei (2014)143 | cohort | 100 | YPFS+Other Chinese medicines+Conventional treatment | Conventional treatment | 6 w | Immune indexes, T lymphocyte subsets | Improved immune indices vs conventional treatment |
|  | Tang (2015)144 | RCT | 80 | YPFS+Other Chinese medicines+Conventional treatment | Conventional treatment | 8 w | Immune indexes, T lymphocyte subsets, Karnofsky Performance Status score | Improved immune function and quality of life |
|  | Dong (2019)145 | RCT | 100 | YPFS+Other Chinese medicines | Conventional treatment | 12 w | Clinical efficacy#, sweating improvement | Improved efficacy and sweating symptoms vs other Chinese medicines |
|  | Jin (2015)146 | RCT | 80 | YPFS+Other Chinese medicines | YPFS | 5 d | Clinical efficacy# | Higher response rate; improved night sweats |
|  | Zhao (2024)147 | RCT | 64 | YPFS+Conventional treatment | Conventional treatment | 4 w | TCM syndrome score, quality of life, T lymphocyte subsets | Improved TCM symptoms, quality of life, and immune function |
|  | Zhu (2022)148 | cohort | 782 | YPFS | Conventional treatment | / | Effective rate of sweating treatment | Improved sweating symptoms; superior efficacy |
|  | Song (2019)149 | case series | 46 | YPFS+Conventional treatment | / | 9 w | Short-term effective rate | High short-term response rate |
| 6.4. 2. Liver Cancer | | | | | | | | |
|  | Wang (2024)150 | RCT | 120 | YPFS+Other Chinese medicines | YPFS | 8 w | Karnofsky Performance Status score, tumor size, TSLP | Improved quality of life; alleviated symptoms; delayed tumor progression |
|  | Huang (2004)151 | case series | 6 | YPFS+Conventional treatment | / | Long-term | Survival time | Symptom relief; prolonged survival; improved quality of life |
|  | Yuan (2005)152 | RCT | 138 | YPFS+Conventional treatment | Conventional treatment | 1-2 w | Clinical efficacy# | Higher response rate vs conventional treatment |
|  | Ma (2014)153 | RCT | 80 | YPFS+Conventional treatment | Conventional treatment | 8 w | Clinical efficacy#, IL-2 | Higher response rate; increased IL-2 |
|  | Zhao (2017)154 | RCT | 80 | YPFS+Conventional treatment | Conventional treatment | 12 w | Liver cancer markers, Th1/Th2 cytokines, T lymphocyte subsets | Reduced tumor markers; enhanced antitumor immunity |
| 6.5 Antiviral and Antibacterial Therapeutic Effects | | | | | | | | |
| 6.5. 1. Respiratory tract infections | | | | | | | | |
|  | Fang (2010)155 | RCT | 100 | YPFS+Conventional treatment | Conventional treatment | 4 w | Clinical efficacy#, T lymphocyte subsets | Improved efficacy; enhanced immune function |
|  | Qin (2013)156 | RCT | 73 | YPFS+Conventional treatment | Conventional treatment | 8 w | Clinical efficacy#, Immune indexes | Higher response rate; improved immune function |
|  | Qian (2023)157 | RCT | 94 | YPFS+Conventional treatment | Conventional treatment | 8 w | Clinical efficacy#, Immune indexes, Inflammatory factors levels | Higher response rate; improved immunity; reduced inflammation |
|  | Chen (2015)158 | RCT | 80 | YPFS+Conventional treatment | Conventional treatment | 8 w | T lymphocyte subsets, Immune indexes, Clinical effective | Improved immune indices; higher response rate |
|  | Zhang (2003)159 | case series | 32 | YPFS | / | 4-8 w | Clinical efficacy# | Effective in preventing respiratory tract infections |
|  | Yang (2002)160 | RCT | 110 | YPFS+Other Chinese medicines | Conventional treatment | 4-8 w | Clinical efficacy# | Higher response rate vs conventional treatment |
|  | Zheng (2014)161 | RCT | 72 | YPFS+Other Chinese medicines | Conventional treatment | / | Cure and improvement rate | Higher cure/improvement rates vs conventional treatment |
|  | Yu (2014)162 | RCT | 66 | YPFS+Conventional treatment | Conventional treatment | 8 w | Clinical efficacy# | Higher response rate vs conventional treatment |
|  | Zhai (2016)12 | RCT | 102 | YPFS+Conventional treatment | Conventional treatment | 6-9 w | Clinical efficacy# | Higher response rate vs conventional treatment |
| 6.5. 2 Hand-foot-and-mouth disease | | | | | | | | |
|  | He (2012)163 | RCT | 110 | YPFS+Conventional treatment | Conventional treatment | 4 w | Clinical efficacy#, Immune indexes | Higher response rate; faster recovery; improved immune indices |
| 6.5.2 Respiratory diseases in children | | | | | | | | |
|  | Zhang (2011)164 | RCT | 135 | YPFS+Conventional treatment | Conventional treatment | 4 w | Clinical efficacy# | Superior efficacy vs conventional treatment |
|  | Zhang (2012)165 | RCT | 200 | YPFS+Conventional treatment | Conventional treatment | 12 w | Wheezing disappearance time, recurrence times | Faster symptom resolution; fewer recurrences |
|  | Lin (2016)166 | RCT | 96 | YPFS+Conventional treatment | Conventional treatment | 1 w | Symptom relief time, inflammatory factors, immune indexes | Faster recovery; improved inflammatory and immune indices |
|  | Lai (2017)167 | RCT | 62 | YPFS+Conventional treatment | Conventional treatment | 1 w | Upper respiratory infection cure rate | Higher cure rate vs conventional treatment |
| 6.5.3 Eye and Mouth Disorders | | | | | | | | |
|  | Wang (2023)168 | RCT | 60 | YPFS+Conventional treatment | Conventional treatment | 1 w | Clinical efficacy# | Higher response rate vs conventional treatment |
|  | Lv (2008)169 | Case series | 76 | YPFS+Conventional treatment | Conventional treatment | 1 w | Clinical efficacy#, Recurrence rate | Reduced recurrence vs conventional treatment |
|  | Ye (2012)170 | RCT | 86 | YPFS+Conventional treatment | Conventional treatment | 2-8 w | Clinical efficacy#, 2-year recurrence rate | Higher cure/response rates; lower 2-year recurrence |
|  | Lu (2021)171 | RCT | 80 | YPFS+Conventional treatment | Conventional treatment | 4 w | Clinical efficacy#, 6-month recurrence rate | Higher response rate; lower 6-month recurrence |
| RQLQ: Rhinoconjunctivitis Quality of Life Questionnaire.  **#**：Clinical efficacy evaluation criteria differ；refer to original articles.  EASI: Eczema Area and Severity Index. | | | | | | | | |
